# Supplementary figures and images for: A broadly distributed toxin family mediates contact-dependent antagonism between gram-positive bacteria
Source: eLife journal article supplement (doi:10.7554/elife.26938), 2017-07-11

Figure 4—figure supplement 3

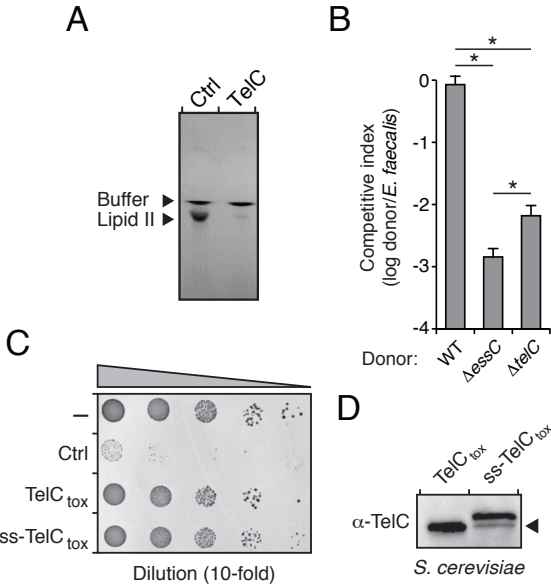

Supplement: supp [file elife-26938-supp-v1.zip]

Figure 1—figure supplement 1

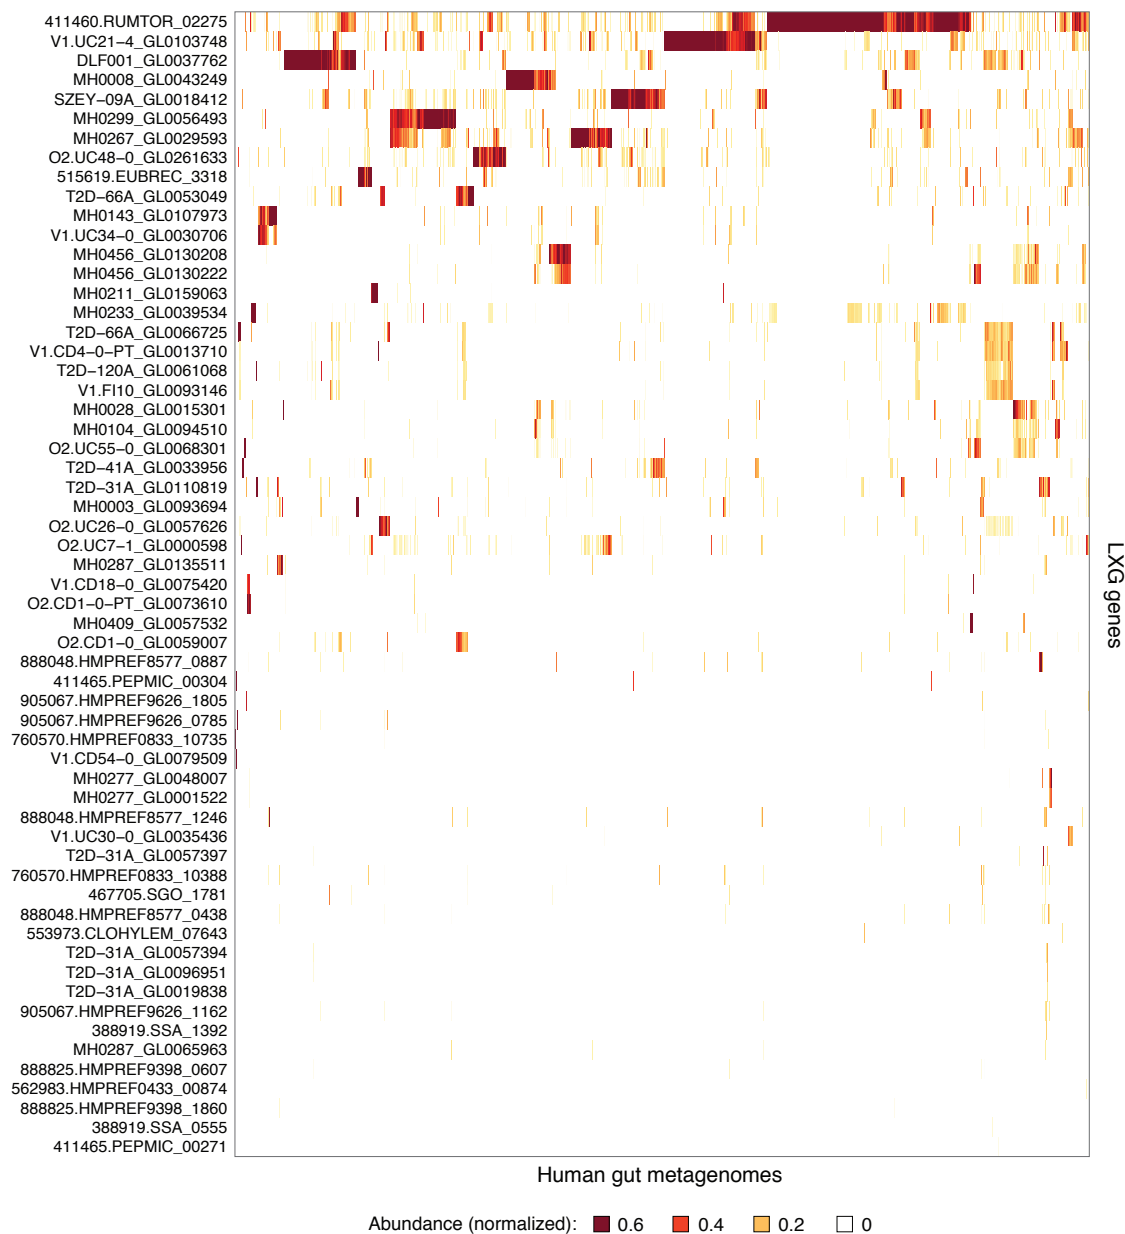

Supplement: supp [file elife-26938-supp-v1.zip]

Figure 2—figure supplement 1

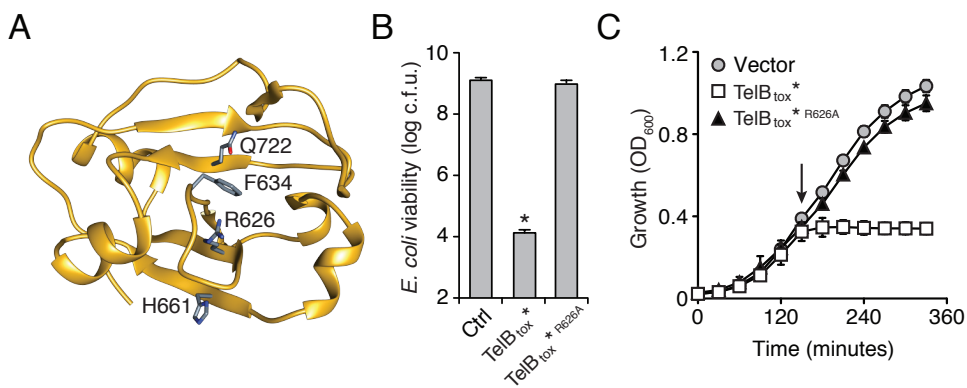

Supplement: supp [file elife-26938-supp-v1.zip]

Figure 3—figure supplement 1

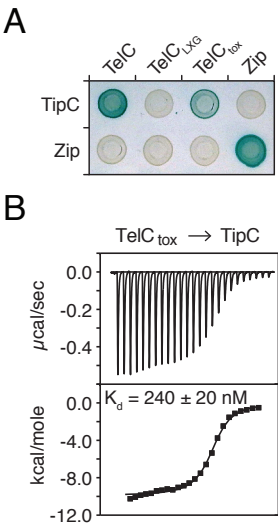

Supplement: supp [file elife-26938-supp-v1.zip]

Figure 4—figure supplement 2

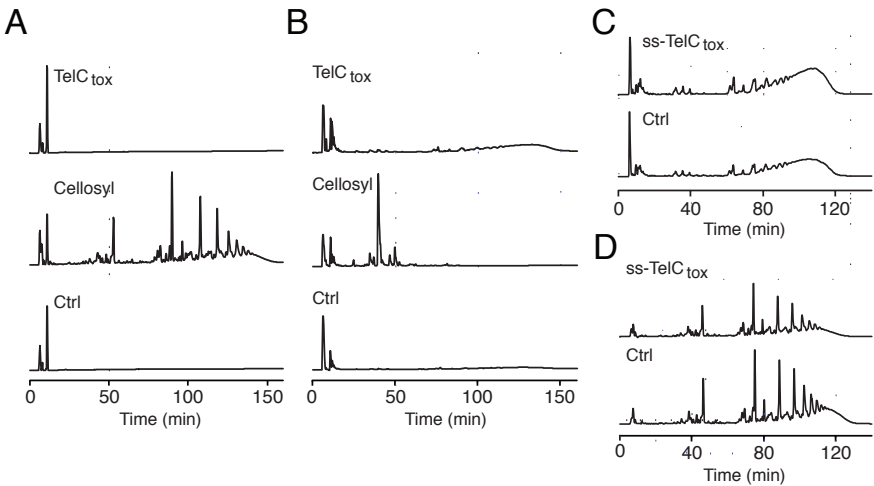

Supplement: supp [file elife-26938-supp-v1.zip]

Figure 5—figure supplement 1

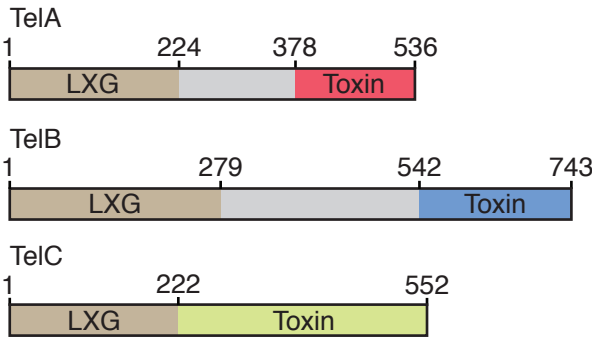

Supplement: supp [file elife-26938-supp-v1.zip]

Figure 4—figure supplement 1

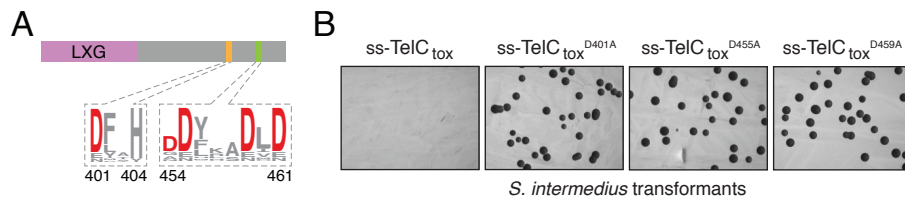

Supplement: supp [file elife-26938-supp-v1.zip]

Figure 3—figure supplement 2

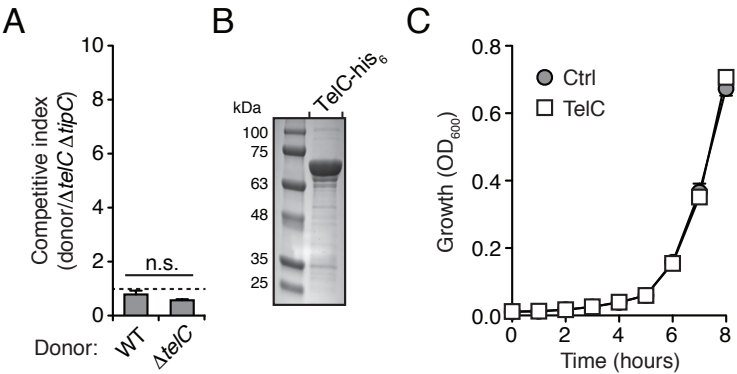

Supplement: supp [file elife-26938-supp-v1.zip]
